# Supplementary material for: Insights into the Genomic Architecture of Seed and Pod Quality Traits in the U.S. Peanut Mini-Core Diversity Panel
Source: MDPI journal article supplement (doi:10.3390/plants11070837), 2022-03-22
Supplement: s1 [file s1]

**Table S1** Information of diversity panel consisting of 120 accessions used in this GWAS study

| #  | PI no.    | Origin        | Botanical variety   |
|----|-----------|---------------|---------------------|
| 1  | Grif12545 | Ecuador       | <i>aequatoriana</i> |
| 2  | Grif14051 | Guatemala     | <i>aequatoriana</i> |
| 3  | PI152146  | Uruguay       | <i>fastigiata</i>   |
| 4  | PI155107  | Uruguay       | <i>vulgaris</i>     |
| 5  | PI157542  | China         | <i>vulgaris</i>     |
| 6  | PI158854  | China         | <i>fastigiata</i>   |
| 7  | PI159786  | Senegal       | <i>hypogaea</i>     |
| 8  | PI162655  | Uruguay       | <i>hypogaea</i>     |
| 9  | PI162857  | Sudan         | <i>hypogaea</i>     |
| 10 | PI196622  | Cote D'Ivoire | <i>hypogaea</i>     |
| 11 | PI196635  | Madagascar    | <i>hypogaea</i>     |
| 12 | PI200441  | Japan         | <i>fastigiata</i>   |
| 13 | PI240560  | South Africa  | <i>hypogaea</i>     |
| 14 | PI259617  | Cuba          | <i>fastigiata</i>   |
| 15 | PI259658  | Cuba          | <i>hypogaea</i>     |
| 16 | PI259748  | Peru          | <i>hypogaea</i>     |
| 17 | PI259836  | Malawi        | <i>fastigiata</i>   |
| 18 | PI259851  | Malawi        | <i>hypogaea</i>     |
| 19 | PI262038  | Brazil        | <i>fastigiata</i>   |
| 20 | PI268586  | Zambia        | <i>hypogaea</i>     |
| 21 | PI268696  | South Africa  | <i>hypogaea</i>     |
| 22 | PI268755  | Zambia        | <i>hypogaea</i>     |
| 23 | PI268806  | Zambia        | <i>hypogaea</i>     |
| 24 | PI268868  | Sudan         | <i>hypogaea</i>     |
| 25 | PI268996  | Zambia        | <i>hypogaea</i>     |
| 26 | PI270786  | Zambia        | <i>hypogaea</i>     |
| 27 | PI270905  | Zambia        | <i>hypogaea</i>     |
| 28 | PI270907  | Zambia        | <i>hypogaea</i>     |
| 29 | PI270998  | Zambia        | <i>vulgaris</i>     |
| 30 | PI271019  | Zambia        | <i>vulgaris</i>     |
| 31 | PI288146  | India         | <i>vulgaris</i>     |
| 32 | PI288210  | India         | <i>vulgaris</i>     |
| 33 | PI290536  | India         | <i>hypogaea</i>     |
| 34 | PI290560  | India         | <i>vulgaris</i>     |

|    |          |              |                   |
|----|----------|--------------|-------------------|
| 35 | PI290566 | India        | <i>fastigiata</i> |
| 36 | PI290594 | India        | <i>hypogaea</i>   |
| 37 | PI290620 | Argentina    | <i>fastigiata</i> |
| 38 | PI292950 | South Africa | <i>hypogaea</i>   |
| 39 | PI295250 | Israel       | <i>hypogaea</i>   |
| 40 | PI295309 | Israel       | <i>hypogaea</i>   |
| 41 | PI295730 | India        | <i>fastigiata</i> |
| 42 | PI296550 | Israel       | <i>hypogaea</i>   |
| 43 | PI296558 | Israel       | <i>hypogaea</i>   |
| 44 | PI298854 | South Africa | <i>hypogaea</i>   |
| 45 | PI313129 | Taiwan       | <i>fastigiata</i> |
| 46 | PI319768 | Israel       | <i>hypogaea</i>   |
| 47 | PI323268 | Pakistan     | <i>hypogaea</i>   |
| 48 | PI325943 | Venezuela    | <i>hypogaea</i>   |
| 49 | PI331297 | Argentina    | <i>hypogaea</i>   |
| 50 | PI331314 | Argentina    | <i>hypogaea</i>   |
| 51 | PI337293 | Brazil       | <i>hypogaea</i>   |
| 52 | PI337399 | Morocco      | <i>hypogaea</i>   |
| 53 | PI337406 | Paraguay     | <i>fastigiata</i> |
| 54 | PI338338 | Venezuela    | <i>peruviana</i>  |
| 55 | PI339960 | Argentina    | <i>fastigiata</i> |
| 56 | PI343384 | Israel       | <i>hypogaea</i>   |
| 57 | PI343398 | Israel       | <i>fastigiata</i> |
| 58 | PI355268 | Mexico       | <i>hypogaea</i>   |
| 59 | PI355271 | Mexico       | <i>hypogaea</i>   |
| 60 | PI356004 | Argentina    | <i>fastigiata</i> |
| 61 | PI370331 | Israel       | <i>hypogaea</i>   |
| 62 | PI371521 | Israel       | <i>hypogaea</i>   |
| 63 | PI372271 | Unknown      | <i>hypogaea</i>   |
| 64 | PI372305 | Nigeria      | <i>hypogaea</i>   |
| 65 | PI390428 | Ecuador      | <i>hypogaea</i>   |
| 66 | PI399581 | Nigeria      | <i>hypogaea</i>   |
| 67 | PI403813 | Argentina    | <i>vulgaris</i>   |
| 68 | PI407667 | Thailand     | <i>vulgaris</i>   |
| 69 | PI429420 | Zimbabwe     | <i>fastigiata</i> |
| 70 | PI442768 | Zimbabwe     | <i>hypogaea</i>   |

|     |          |              |                   |
|-----|----------|--------------|-------------------|
| 71  | PI461427 | China        | <i>hypogaea</i>   |
| 72  | PI461434 | China        | <i>hypogaea</i>   |
| 73  | PI468250 | Bolivia      | <i>hypogaea</i>   |
| 74  | PI471952 | Zimbabwe     | <i>hypogaea</i>   |
| 75  | PI471954 | Zimbabwe     | <i>fastigiata</i> |
| 76  | PI475863 | Bolivia      | <i>fastigiata</i> |
| 77  | PI475918 | Bolivia      | <i>fastigiata</i> |
| 78  | PI476025 | Peru         | <i>fastigiata</i> |
| 79  | PI476432 | Nigeria      | <i>hypogaea</i>   |
| 80  | PI476636 | Nigeria      | <i>hypogaea</i>   |
| 81  | PI478819 | India        | <i>vulgaris</i>   |
| 82  | PI478850 | Uganda       | <i>fastigiata</i> |
| 83  | PI481795 | Mozambique   | <i>hypogaea</i>   |
| 84  | PI482120 | Zimbabwe     | <i>hypogaea</i>   |
| 85  | PI482189 | Zimbabwe     | <i>fastigiata</i> |
| 86  | PI493329 | Argentina    | <i>fastigiata</i> |
| 87  | PI493356 | Argentina    | <i>fastigiata</i> |
| 88  | PI493547 | Argentina    | <i>fastigiata</i> |
| 89  | PI493581 | Argentina    | <i>fastigiata</i> |
| 90  | PI493631 | Argentina    | <i>fastigiata</i> |
| 91  | PI493693 | Argentina    | <i>fastigiata</i> |
| 92  | PI493717 | Argentina    | <i>fastigiata</i> |
| 93  | PI493729 | Argentina    | <i>fastigiata</i> |
| 94  | PI493880 | Argentina    | <i>fastigiata</i> |
| 95  | PI493938 | Argentina    | <i>fastigiata</i> |
| 96  | PI494018 | Argentina    | <i>vulgaris</i>   |
| 97  | PI494034 | Argentina    | <i>vulgaris</i>   |
| 98  | PI494795 | Zambia       | <i>hypogaea</i>   |
| 99  | PI496401 | Burkina Faso | <i>hypogaea</i>   |
| 100 | PI496448 | Burkina Faso | <i>hypogaea</i>   |
| 101 | PI497318 | Bolivia      | <i>hypogaea</i>   |
| 102 | PI497395 | Bolivia      | <i>hypogaea</i>   |
| 103 | PI497517 | Brazil       | <i>fastigiata</i> |
| 104 | PI497639 | Ecuador      | <i>fastigiata</i> |
| 105 | PI497648 | Ecuador      | <i>fastigiata</i> |
| 106 | PI501272 | Peru         | <i>hypogaea</i>   |

|     |          |          |                     |
|-----|----------|----------|---------------------|
| 107 | PI502040 | Peru     | <i>fastigiata</i>   |
| 108 | PI502111 | Peru     | <i>peruviana</i>    |
| 109 | PI502120 | Peru     | <i>peruviana</i>    |
| 110 | PI504614 | Colombia | <i>hypogaea</i>     |
| 111 | PI576613 | Mexico   | <i>hirsuta</i>      |
| 112 | PI576614 | Mexico   | <i>hirsuta</i>      |
| 113 | PI576634 | Mexico   | <i>hirsuta</i>      |
| 114 | PI576636 | Mexico   | <i>hirsuta</i>      |
| 115 | PI576637 | Mexico   | <i>hirsuta</i>      |
| 116 | PI648241 | Ecuador  | <i>hirsuta</i>      |
| 117 | PI648242 | Ecuador  | <i>aequatoriana</i> |
| 118 | PI648245 | Ecuador  | <i>aequatoriana</i> |
| 119 | PI648249 | Ecuador  | <i>aequatoriana</i> |
| 120 | PI648250 | Ecuador  | <i>aequatoriana</i> |

**Table S2** Co-localizing genomic regions for seed quality traits, seed germination, and seed dormancy discovered in this GWAS study.

| <b>Trait</b>            | <b>SNP marker</b> | <b>Chr.</b> | <b>position</b> | <b>−log10(P-Value)</b> | <b>PVE (%)</b> |
|-------------------------|-------------------|-------------|-----------------|------------------------|----------------|
| SMK                     | AX-147223416      | A05         | 97286880        | 3.52                   | 11.14          |
| shelling %              | AX-176818835      | A05         | 100814719       | 3.68                   | 11.69          |
| SMK                     | AX-176823847      | B05         | 118253381       | 5.27                   | 17.07          |
| shelling %              | AX-176813166      | B05         | 119858337       | 4.06                   | 13.01          |
| shelling %              | AX-177643293      | B08         | 11599042        | 3.17                   | 9.94           |
| SMK                     | AX-177642165      | B08         | 14742332        | 3.59                   | 11.39          |
| shelling %              | AX-147216060      | A03         | 13426004        | 5.09                   | 16.48          |
| 7days                   | AX-176801636      | A03         | 14091817        | 4.04                   | 14.39          |
| shelling %              | AX-176811900      | B01         | 123973617       | 5.99                   | 19.44          |
| 7days                   | AX-176823831      | B01         | 125913979       | 3.02                   | 10.49          |
| shelling %              | AX-147239086      | B01         | 126117760       | 3.69                   | 11.74          |
| shelling %              | AX-176802081      | B05         | 120108986       | 4.32                   | 13.89          |
| 7days                   | AX-176797808      | B05         | 121063906       | 3.19                   | 11.13          |
| shelling %              | AX-147258677      | B08         | 106271132       | 4.01                   | 12.84          |
| 7days                   | AX-147258769      | B08         | 110623990       | 3.78                   | 13.41          |
| shelling %              | AX-176823311      | B10         | 127323301       | 3.71                   | 11.81          |
| 7days                   | AX-147264901      | B10         | 129930580       | 3.59                   | 12.68          |
| 7days                   | AX-176811574      | A10         | 70323232        | 3.08                   | 10.71          |
| seed wt                 | AX-177638040      | A10         | 76559318        | 5.78                   | 20.79          |
| 7days                   | AX-147224061      | A06         | 51298           | 3.45                   | 12.15          |
| seed wt                 | AX-176801078      | A06         | 6527694         | 3.20                   | 11.17          |
| 7days                   | AX-176822445      | B05         | 7631930         | 3.06                   | 10.64          |
| seed wt                 | AX-176817345      | B05         | 8733975         | 3.25                   | 11.39          |
| 7days                   | AX-177639567      | B10         | 110673150       | 3.09                   | 10.76          |
| seed wt                 | AX-177639117      | B10         | 120152356       | 3.04                   | 10.57          |
| shelling %              | AX-147216060      | A03         | 13426004        | 5.09                   | 16.48          |
| 7, 14,21, Seed Dormancy | AX-176801636      | A03         | 14091817        | 4.17                   | 14.88          |
| 14, 21, Seed Dormancy   | AX-176807956      | A03         | 14799828        | 3.20                   | 11.17          |
| LSK                     | AX-176820794      | A03         | 15685730        | 3.16                   | 9.9            |
| Seed Dormancy           | AX-176799002      | A03         | 15708945        | 3.19                   | 11.15          |
| LSK                     | AX-176821054      | A03         | 16832251        | 3.16                   | 9.9            |
| SMK                     | AX-147223416      | A05         | 97286880        | 3.52                   | 11.14          |
| shelling %              | AX-176818835      | A05         | 100814719       | 3.68                   | 11.69          |
| shelling %              | AX-147223558      | A05         | 101618480       | 4.06                   | 13.01          |
| Seed Dormancy           | AX-176819528      | A05         | 102860702       | 3.37                   | 11.84          |
| Seed Dormancy           | AX-176804849      | A05         | 106482015       | 3.37                   | 11.84          |
| seed wt                 | AX-177638040      | A10         | 76559318        | 5.78                   | 20.79          |
| 14, 21, Seed Dormancy   | AX-177641629      | A10         | 83734285        | 3.20                   | 11.17          |

|                         |              |     |           |      |       |
|-------------------------|--------------|-----|-----------|------|-------|
| shelling %              | AX-147236668 | A10 | 101148536 | 4.69 | 15.15 |
| 14, 21, Seed Dormancy   | AX-176805268 | B02 | 94348554  | 3.82 | 13.55 |
| LSK                     | AX-176811899 | B02 | 95026708  | 4.04 | 12.95 |
| seed wt                 | AX-176820704 | B02 | 95335297  | 3.69 | 13.06 |
| LSK                     | AX-176822571 | B02 | 96680636  | 3.56 | 11.29 |
| LSK                     | AX-176823190 | B02 | 96680828  | 3.57 | 11.3  |
| shelling %              | AX-176813093 | B02 | 97213496  | 4.51 | 14.55 |
| 7, 14,21, Seed Dormancy | AX-176809013 | B05 | 115522414 | 3.86 | 13.69 |
| Seed Dormancy           | AX-176797150 | B05 | 116237196 | 3.37 | 11.84 |
| SMK                     | AX-176823847 | B05 | 118253381 | 5.27 | 17.07 |
| shelling %              | AX-176813166 | B05 | 119858337 | 4.06 | 13.01 |
| shelling %              | AX-176802081 | B05 | 120108986 | 4.32 | 13.89 |
| 14, 21, Seed Dormancy   | AX-176818622 | B07 | 2173393   | 3.82 | 13.55 |
| shelling %              | AX-177639525 | B07 | 2839129   | 3.75 | 11.95 |
| LSK                     | AX-147254688 | B07 | 4382301   | 3.39 | 10.7  |
| LSK                     | AX-147254691 | B07 | 4382872   | 3.08 | 9.6   |
| shelling %              | AX-177643293 | B08 | 11599042  | 3.17 | 9.94  |
| SMK                     | AX-177642165 | B08 | 14742332  | 3.59 | 11.39 |
| 7days                   | AX-176821555 | B08 | 19124117  | 3.42 | 12.02 |

7th, 14th, and 21st represent germination rate at 7th, 14th, and 21st day.

Weight of hundred seeds (seed wt), Sound Mature Kernel (SMK), shelling percent, and Loose Shelled Kernel (LSK)
